# Supplementary material
Source: Elsevier journal article supplement (https://www.sciencedirect.com/science/article/pii/S2255553618300478)
Supplement: mmc1 [file S2255553618300478:mmc1.docx]

**Supplemental Figure 1 - Secretory phospholipase (sPLA2) enzyme activity tracking groups. High-risk status in childhood and adulthood defined as being in the highest quarter of the age- and sex-specific distribution.**

**
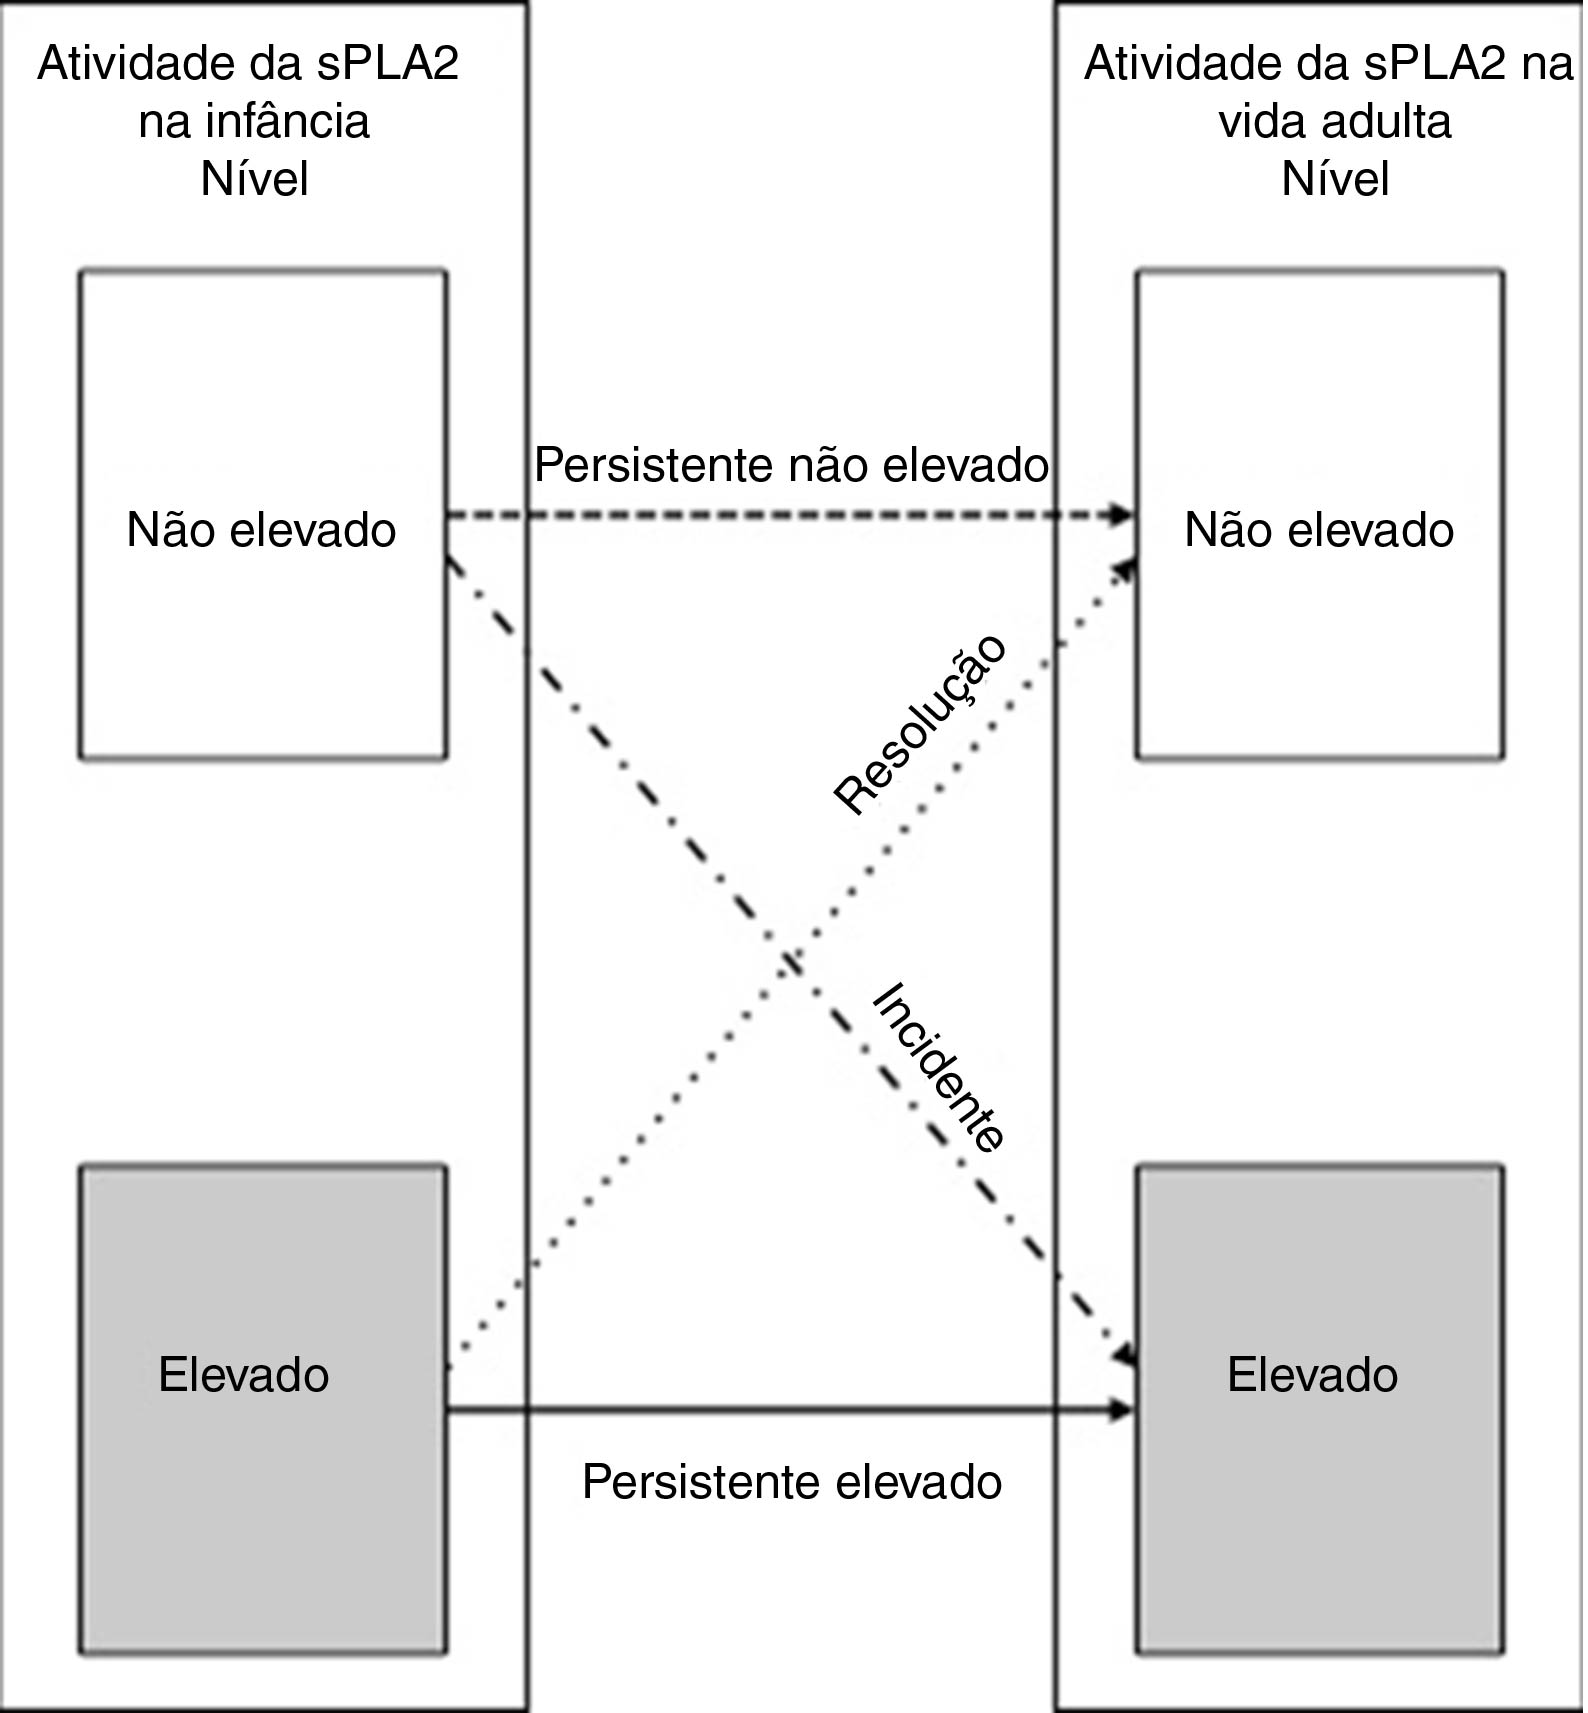
**
