# Supplementary material
Source: Elsevier journal article supplement (https://www.sciencedirect.com/science/article/pii/S2255553618300478)
Supplement: mmc2 [file S2255553618300478:mmc2.docx]

Tabela complementar 1 – Coeficientes de correlação da classificação de Pearson para monitoramento da atividade da enzima fosfolipase (sPLA2) secretória da infância (1980) à vida adulta (2001) no Estudo de Riscos Cardiovasculares em Jovens Finlandesesa

|  |  |  |  |  | Idade em 1980 (anos) | | | | | | |  |  |  |  |
| --- | --- | --- | --- | --- | --- | --- | --- | --- | --- | --- | --- | --- | --- | --- | --- |
|  |  |  |  |  |  |  |  |  |  |  |  |  |  |  |  |
|  |  |  | 3 |  | 6 |  | 9 |  | 12 |  | 15 |  | 18 |  | Todosb |
| Atividade da enzima sPLA2 | |  |  |  |  |  |  |  |  |  |  |  |  |  |  |
|  | Meninos |  | 0,44 (150) |  | 0,44 (137) |  | 0,33 (175) |  | 0,34 (165) |  | 0,43 (175) |  | 0,31 (160) |  | 0,39 (962) |
|  | Meninas |  | 0,25 (82) |  | 0,35 (114) |  | 0,44 (129) |  | 0,52 (158) |  | 0,58 (156) |  | 0,28 (134) |  | 0,45 (773) |
|  |  |  |  |  |  |  |  |  |  |  |  |  |  |  |  |

a Todos p < 0,001.

b Ajustado para a idade.

**Tabela complementar 2 – Proporções de participantes que continuaram no quadrante de atividade da enzima sPLA2 da infância à vida adulta**

|  |  | Quadrante de adultos (Q) | | | |
| --- | --- | --- | --- | --- | --- |
|  | Quadrante de crianças | Q1 | Q2 | Q3 | Q4 |
| Sexo masculino | Q1 | 101 (41,2) | 75 (30,6) | 49 (20,0) | 20 (8,2) |
|  | Q2 | 76 (31,7) | 68 (28,3) | 59 (24,6) | 37 (15,4) |
|  | Q3 | 41 (17,2) | 57 (24,0) | 63 (26,5) | 77 (32,4) |
|  | Q4 | 29 (12,1) | 39 (16,3) | 70 (29,3) | 101 (42,3) |
| Sexo feminino | Q1 | 90 (48,4) | 51 (27,4) | 32 (17,2) | 13 (7,0) |
|  | Q2 | 59 (30,7) | 60 (31,3) | 47 (24,5) | 26 (13,5) |
|  | Q3 | 37 (18,1) | 54 (26,3) | 67 (32,7) | 47 (22,9) |
|  | Q4 | 22 (11,6) | 41 (21,6) | 59 (31,1) | 68 (35,8) |
| Todos | Q1 | 191 (44,3) | 126 (29,2) | 81 (18,8) | 33 (7,7) |
|  | Q2 | 135 (31,3) | 128 (29,6) | 106 (24,5) | 63 (14,6) |
|  | Q3 | 78 (17,6) | 111 (25,1) | 130 (29,4) | 124 (28,0) |
|  | Q4 | 51 (11,9) | 80 (18,7) | 129 (30,1) | 169 (39,4) |

Observação: Os dados estão em N (percentual).

**Tabela complementar 3 – Comparação dos coeficientes de correlação da classificação para monitoramento de 21 anos das variáveis de riscos cardiovasculares no Estudo de Riscos Cardiovasculares em Jovens Finlandeses**

| Variável |  | r |  |
| --- | --- | --- | --- |
| Lipoproteína de alta densidade-colesterola |  | 0,49 |  |
| Lipoproteína de baixa densidade-colesterola |  | 0,47 |  |
| Índice de massa corporala |  | 0,39 |  |
| Pressão arterial sistólicaa |  | 0,30 |  |
| Proteína C reativa de alta sensibilidadea |  | 0,29 |  |
| Atividade da enzima sPLA2b |  | 0,43 |  |

a Relatado por Juonala et al.[16]

b Estudo atual.
